# Supplementary figures and images for: Phosphodiesterase 10A in Schizophrenia: A PET Study Using [11C]IMA107
Source: Atypon-hosted journal article supplement (doi:10.1176/appi.ajp.2015.15040518), 2016-02-19

**Figure S1.** The biology of PDE10A

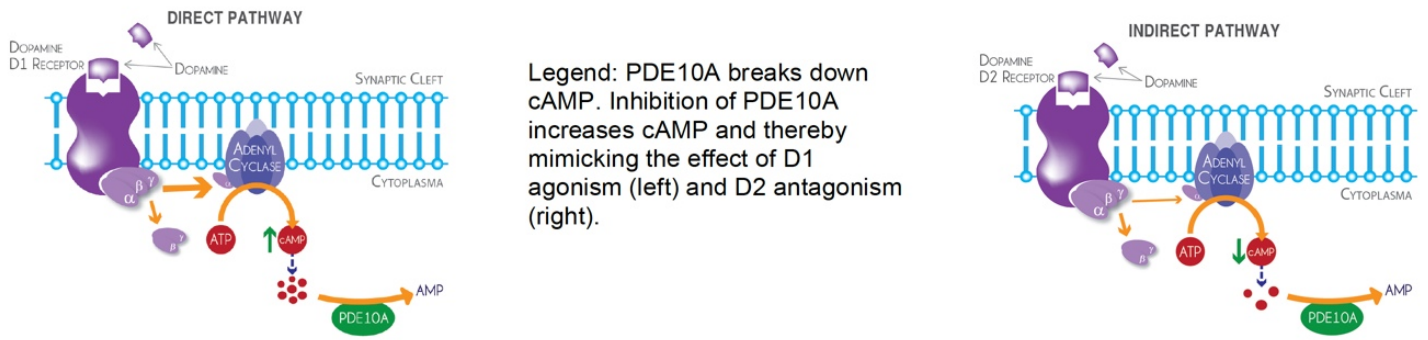

Supplement: appi.ajp.2015.15040518.ds001.pdf [file appi.ajp.2015.15040518.ds001.pdf]
